# Supplementary material
Source: PubMed Central journal article supplement (PMC3323023)
Supplement: supp_M111.320184_jbc.M111.320184-1.pdf [file supp_M111.320184_jbc.M111.320184-1.pdf]

EXAMINATION OF THE MECHANISM OF N-ACETYL-1-D-MYO-INOSITYL-2-AMINO-2-DEOXY- $\alpha$ -D-GLUCOPYRANOSIDE DEACETYLASE (MSHB)  
REVEALS AN UNEXPECTED ROLE FOR A DYNAMIC TYROSINE

Xinyi Huang and Marcy Hernick\* $\dagger$

Department of Biochemistry, Virginia Tech, Blacksburg, VA 24061

**SUPPLEMENTAL DATA**

Contents:

Table S1. Effect of solvent viscosity on WT MshB

Table S2. Effect of solvent viscosity on MshB mutants ( $k_{cat}$ )

Table S3. Effect of solvent viscosity on MshB mutants ( $k_{cat}/K_M$ )

Figure S1. Effect of solvent viscosity on activity ( $k_{cat}$ ) of H144A

Figure S2. Effect of NaCl on MshB activity

Figure S3. Michealis-Menten plot for steady-state turnover by MshB mutants

Figure S4. Effect of solvent viscosity on MshB activity ( $k_{cat}/K_M$ )

Figure S5. NaF inhibition of MshB

Figure S6. Solvent isotope effect of MshB under  $V$  conditions

Figure S7. Activation of apo-D146A MshB with titrating amounts of  $Zn^{2+}$

Figure S8. Hydrophobicity and Surface Area Correlation Plots for position 142

**Table S1.** Effect of solvent viscosity on WT MshB

| MshB variant <sup>a</sup> | Viscogen | Y-axis                                                                     | X-axis                     | Slope              | R <sup>2</sup> |
|---------------------------|----------|----------------------------------------------------------------------------|----------------------------|--------------------|----------------|
| WT                        | Glycerol | $^{\circ}k_{\text{cat}}/k_{\text{cat}}$                                    | $\eta_{\text{rel}}$        | $0.74 \pm 0.13$    | 0.945          |
|                           | Sucrose  |                                                                            |                            | $0.62 \pm 0.11$    | 0.911          |
|                           | Ficoll   |                                                                            |                            | $0.03 \pm 0.006$   | 0.956          |
| WT                        | Glycerol | $(^{\circ}k_{\text{cat}}/K_{\text{M}})/(k_{\text{cat}}/K_{\text{M}})$      | $\eta_{\text{rel}}$        | $1.72 \pm 0.12$    | 0.990          |
|                           | Sucrose  |                                                                            |                            | $1.70 \pm 0.28$    | 0.924          |
|                           | Ficoll   |                                                                            |                            | $-0.086 \pm 0.02$  | 0.958          |
| WT                        | Glycerol | $\log (^{\circ}k_{\text{cat}}/k_{\text{cat}})$                             | $\log (\eta_{\text{rel}})$ | $0.72 \pm 0.09$    | 0.889          |
|                           | Sucrose  |                                                                            |                            | $0.81 \pm 0.06$    | 0.878          |
|                           | Ficoll   |                                                                            |                            | $0.05 \pm 0.01$    | 0.810          |
| WT                        | Glycerol | $\log (^{\circ}k_{\text{cat}}/k_{\text{cat}})$                             | $\eta_{\text{rel}}^2$      | $0.044 \pm 0.005$  | 0.923          |
|                           | Sucrose  |                                                                            |                            | $0.095 \pm 0.01$   | 0.571          |
|                           | Ficoll   |                                                                            |                            | $0.005 \pm 0.0003$ | 0.983          |
| WT                        | Glycerol | $\log (^{\circ}k_{\text{cat}}/K_{\text{M}})/(k_{\text{cat}}/K_{\text{M}})$ | $\log (\eta_{\text{rel}})$ | $1.45 \pm 0.09$    | 0.975          |
|                           | Sucrose  |                                                                            |                            | $1.57 \pm 0.2$     | 0.852          |
|                           | Ficoll   |                                                                            |                            | $-0.19 \pm 0.05$   | 0.890          |
| WT                        | Glycerol | $\log (^{\circ}k_{\text{cat}}/K_{\text{M}})/(k_{\text{cat}}/K_{\text{M}})$ | $\eta_{\text{rel}}^2$      | $0.044 \pm 0.15$   | 0.778          |
|                           | Sucrose  |                                                                            |                            | $0.045 \pm 0.13$   | 0.822          |

<sup>a</sup> apo-MshB was incubated with stoichiometric Zn<sup>2+</sup> for 30 min prior to activity measurement with a sub-saturating concentration (5 mM) or saturating concentration (100 mM) of GlcNAc as described in “Materials and Methods”. A linear equation was fit to the resulting data. Select graphical representations of data are shown in Figures 2 and S4.

**Table S2.** Effect of solvent viscosity on MshB mutants ( $k_{cat}$ )

| MshB Variant <sup>a</sup> | Viscogen              | Y-axis                           | X-axis              | Slope          | R <sup>2</sup> |
|---------------------------|-----------------------|----------------------------------|---------------------|----------------|----------------|
| D15A                      | Glycerol              | $^{\circ}k_{cat}/k_{cat}$        | $\eta_{rel}$        | 1.62 ± 0.18    | 0.975          |
|                           | Sucrose               |                                  |                     | 1.80 ± 0.19    | 0.967          |
| Y142F                     | Sucrose               |                                  |                     | 0.01 ± 0.02    | 0.075          |
| H144A                     | Glycerol              |                                  |                     | 0.53 ± 0.04    | 0.988          |
|                           | Sucrose               |                                  |                     | 0.14 ± 0.02    | 0.967          |
| D15A                      | Glycerol              | $\log (^{\circ}k_{cat}/k_{cat})$ | $\log (\eta_{rel})$ | 1.37 ± 0.07    | 0.973          |
|                           | Sucrose               |                                  |                     | 1.39 ± 0.06    | 0.982          |
| Y142F                     | Sucrose               |                                  |                     | -0.02 ± 0.02   | 0.041          |
| H144A                     | Glycerol              |                                  |                     | 1.09 ± 0.03    | 0.991          |
|                           | Glycerol <sup>b</sup> |                                  |                     | 0.92 ± 0.09    | 0.927          |
|                           | Sucrose               |                                  |                     | 0.33 ± 0.03    | 0.947          |
| D15A                      | Glycerol              | $\log (^{\circ}k_{cat}/k_{cat})$ | $\eta_{rel}^2$      | 0.082 ± 0.01   | 0.920          |
|                           | Sucrose               |                                  |                     | 0.081 ± 0.005  | 0.980          |
| Y142F                     | Sucrose               |                                  |                     | -0.001 ± 0.001 | 0.327          |
| H144A                     | Glycerol              |                                  |                     | 0.065 ± 0.006  | 0.950          |
|                           | Sucrose               |                                  |                     | 0.02 ± 0.002   | 0.972          |

<sup>a</sup> apo-MshB was incubated with stoichiometric Zn<sup>2+</sup> for 30 min prior to activity measurement with a saturating concentration (100mM) of GlcNAc as described in “Materials and Methods”. Select graphical representations of data are shown in Figures 2, 3, and S4. <sup>b</sup> Substrate = 300 mM GlcNAc

**Table S3.** Effect of solvent viscosity on MshB mutants ( $k_{cat}/K_M$ )

| MshB Variant <sup>a</sup> | Viscogen | Y-axis                                     | X-axis            | Slope             | R <sup>2</sup> |
|---------------------------|----------|--------------------------------------------|-------------------|-------------------|----------------|
| Y142F                     | Sucrose  | $(^{\circ}k_{cat}/K_M)/(k_{cat}/K_M)$      | $\eta_{rel}$      | $0.31 \pm 0.03$   | 0.960          |
| D146A                     | Glycerol |                                            |                   | $0.30 \pm 0.05$   | 0.976          |
|                           | Sucrose  |                                            |                   | $0.03 \pm 0.02$   | 0.731          |
| Y142F                     | Sucrose  | $\log (^{\circ}k_{cat}/K_M)/(k_{cat}/K_M)$ | $\log \eta_{rel}$ | $0.48 \pm 0.03$   | 0.957          |
| D146A                     | Glycerol |                                            |                   | $0.40 \pm 0.03$   | 0.937          |
|                           | Sucrose  |                                            |                   | $0.05 \pm 0.01$   | 0.551          |
| Y142F                     | Sucrose  | $\log (^{\circ}k_{cat}/K_M)/(k_{cat}/K_M)$ | $\eta_{rel}^2$    | $0.04 \pm 0.03$   | 0.864          |
| D146A                     | Glycerol |                                            |                   | $0.03 \pm 0.003$  | 0.957          |
|                           | Sucrose  |                                            |                   | $0.003 \pm 0.001$ | 0.547          |

<sup>a</sup> apo-MshB was incubated with stoichiometric Zn<sup>2+</sup> for 30 min prior to activity measurement with a sub-saturating concentration of GlcNAc (5 mM, Y142F; 50 mM, D146A) as described in “Materials and Methods”. A linear equation was fit to the resulting data. Select graphical representations of data are shown in Figure S4.

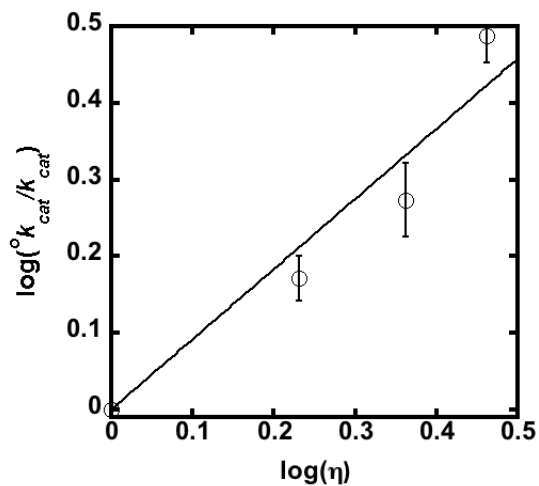

**Figure S1.** Effect of solvent viscosity activity ( $k_{cat}$ ) of H144A. The effects of the microviscogen glycerol (0-35% (w/v)) on H144A MshB. Apo-MshB was incubated with stoichiometric  $Zn^{2+}$ . After 30 minutes, the enzyme was diluted into assay buffer (50 mM HEPES, 1 mM TECP, 50 mM NaCl pH 7.5) containing substrate and the initial rates for the deacetylation of saturating concentration (300 mM) GlcNAc as described under “Materials and Methods”. The slopes are provided in Supplemental Data Table S1.

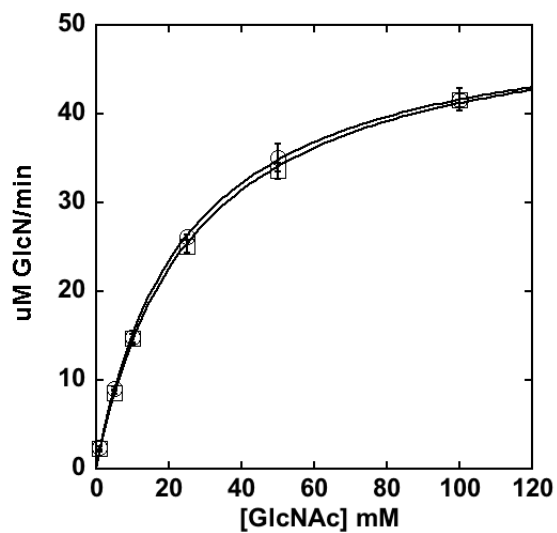

**Figure S2:** Effect of NaCl on MshB activity. Steady-state turnover of  $\text{Zn}^{2+}$ -MshB in the presence of (○) 50 mM NaCl or (□) 250 mM NaCl. Apo-MshB was incubated with stoichiometric  $\text{Zn}^{2+}$ . After 30 minutes, the enzyme was diluted into assay buffer containing substrate and the initial rates for the deacetylation of GlcNAc (0-100 mM) were measured at 30 °C as described in “Materials and Methods”. The steady-state parameters  $k_{\text{cat}}$ ,  $K_{\text{M}}$ , and  $k_{\text{cat}}/K_{\text{M}}$  (Table 1) were obtained by fitting the Michaelis-Menten equation to the initial rates.

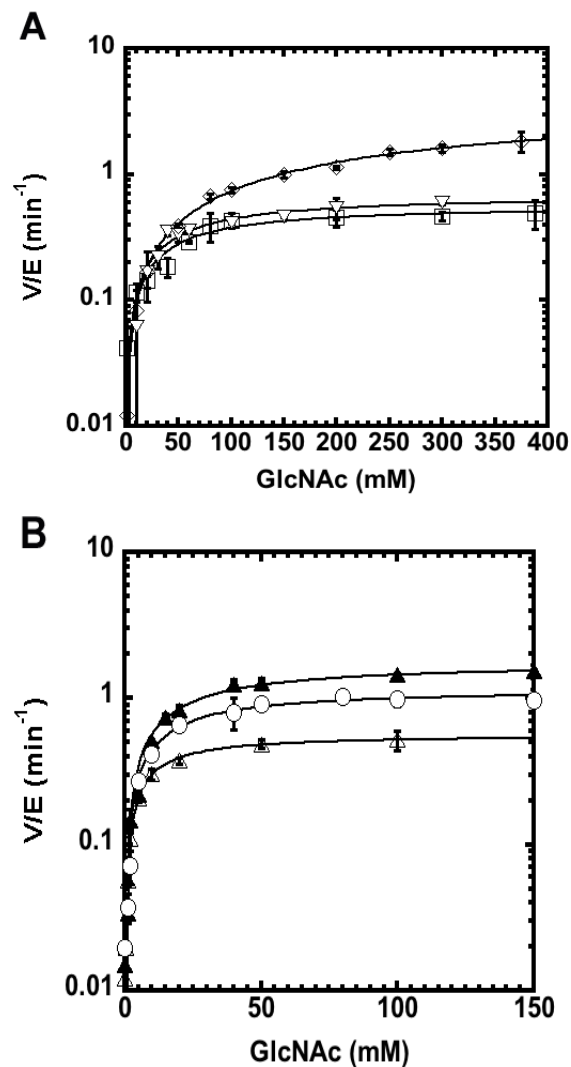

**Figure S3:** Michealis-Menten plot for steady-state turnover by MshB mutants. GlcNAc (0-375 mM) was pre-equilibrated at 30 °C in assay buffer (50 mM HEPES, 50 mM NaCl, 1 mM TCEP pH 7.5) and the reaction was initiated by the addition of MshB. The resulting activity was measured as described in “Materials and Methods”. The steady-state parameters  $k_{\text{cat}}$ ,  $K_M$ , and  $k_{\text{cat}}/K_M$  were obtained by fitting the Michaelis-Menten equation to the initial rates and are shown in Table 1.

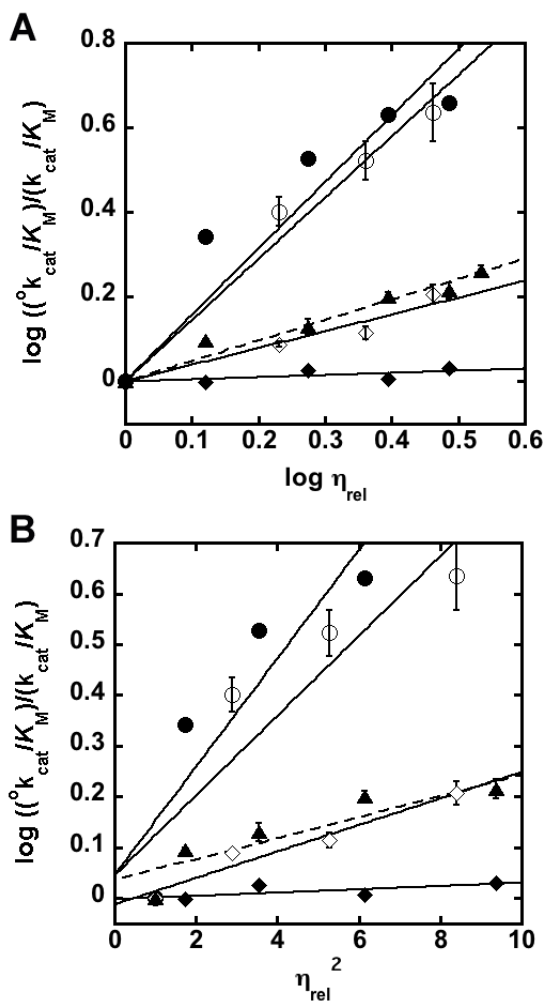

**Figure S4:** Effect of solvent viscosity on MshB activity ( $k_{cat}/K_M$ ). The effects of the microviscogens sucrose (0-35% (w/v)) and glycerol (0-35% (w/v)) on WT MshB are depicted as (●) and (○), respectively. The effects of the microviscogens sucrose (0-35% (w/v)) and glycerol (0-35% (w/v)) on D146A MshB are depicted as (◆) and (◇), respectively, while the effect of sucrose (0-35% (w/v)) on Y142F is depicted as (▲). Apo-MshB was incubated with stoichiometric  $Zn^{2+}$ . After 30 minutes, the enzyme was diluted into assay buffer (50 mM HEPES, 1 mM TECP, 50 mM NaCl pH 7.5) containing substrate and the initial rates for the deacetylation of sub-saturating concentration (WT, 5 mM; D146A, 50 mM) GlcNAc as described under “Materials and Methods”.



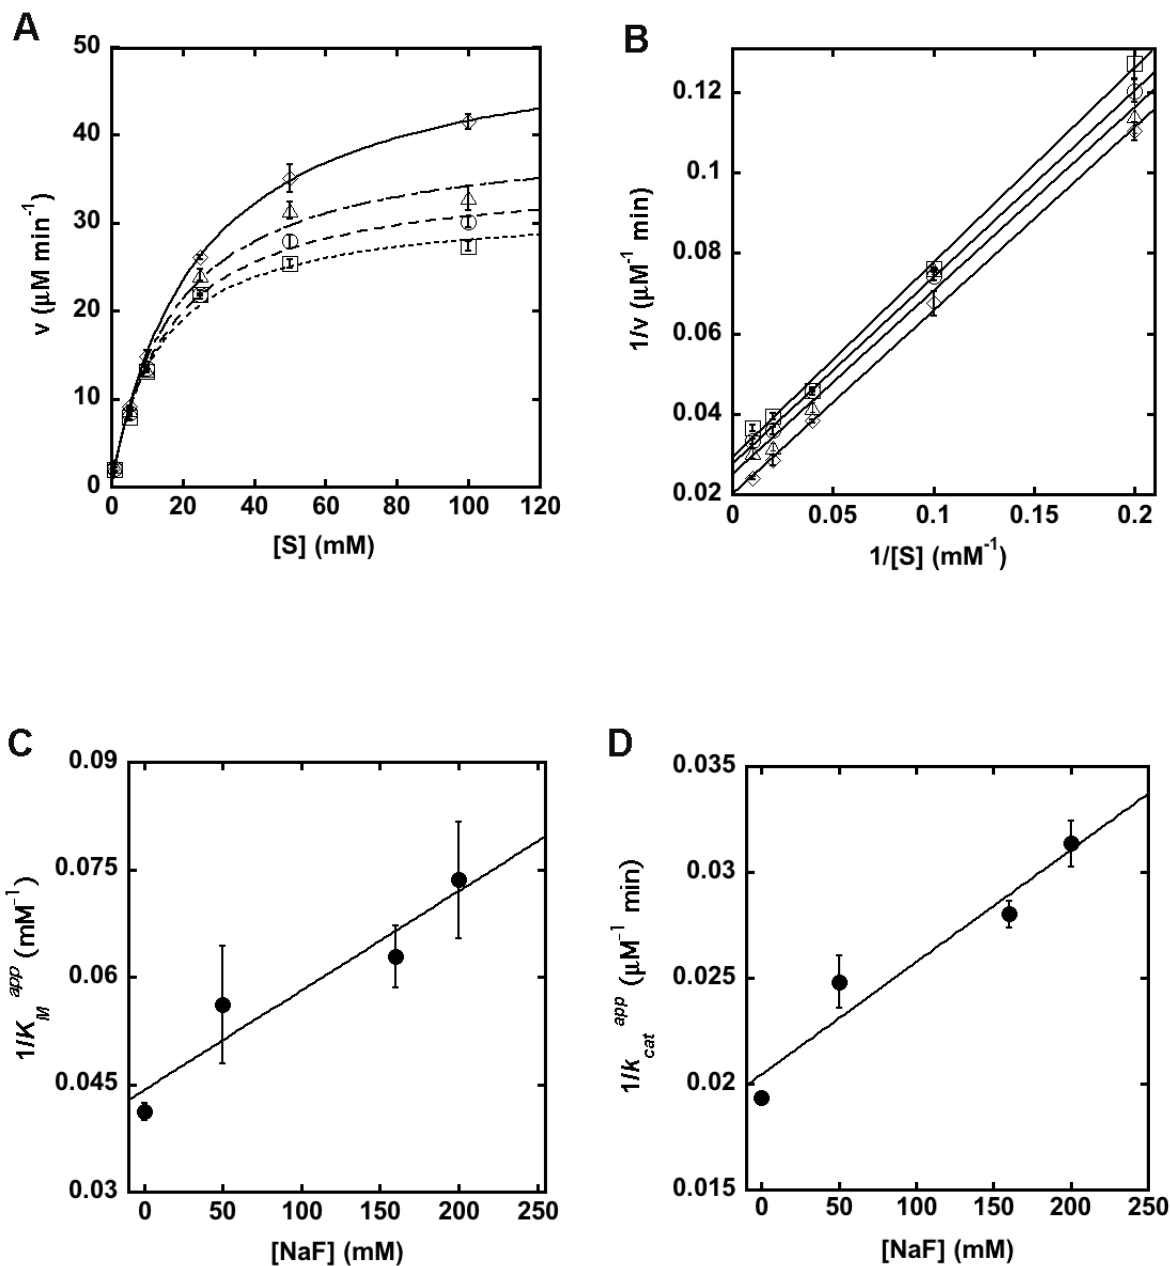

**Figure S5:** NaF inhibition of MshB activity. (A) Michaelis-Menten plot and (B) double-reciprocal plot of  $\text{Zn}^{2+}$ -MshB activity at various fluoride concentrations. Fluoride concentrations were 0 ( $\diamond$ ), 50 ( $\triangle$ ), 160 ( $\circ$ ), and 200 ( $\square$ ) mM. The parallel lines in panel (B) are indicative of uncompetitive inhibition. Replots showing the linear relationships between (C)  $1/K_M^{\text{app}}$  and (D)  $1/k_{\text{cat}}^{\text{app}}$  and fluoride concentration. Assays were performed at 30°C (50 mM HEPES, 1 mM TECP, 50mM NaCl pH 7.5) with various concentrations of GlcNAc as described under “Materials and Methods”. The  $K_I$  values for fluoride are estimated to be 0.32 and 0.38 M for  $1/K_M^{\text{app}}$  and  $1/k_{\text{cat}}^{\text{app}}$ , respectively.

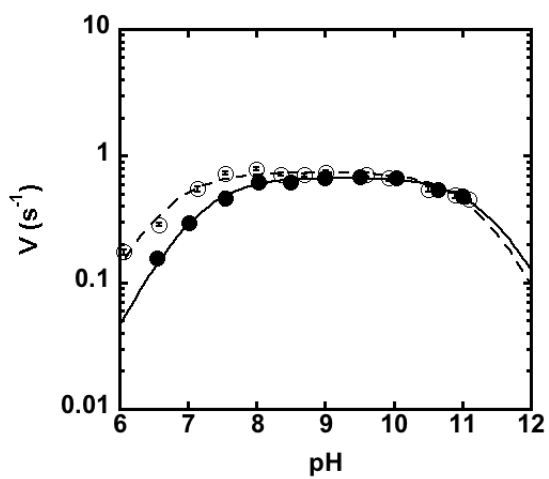

**Figure S6:** Solvent isotope effect of MshB. The solvent isotope for MshB was measured in H<sub>2</sub>O (○) and 95% D<sub>2</sub>O (●) at 30°C. Solvent isotope effects were measured under saturating substrate concentrations of GlcNAc (100 mM) as described under “Materials and Methods”. The pK<sub>a</sub> values were determined by fitting an equation with two ionizations (Eq. 1) to these data and are 7.1 ± 0.1 and 11.4 ± 0.1, respectively.

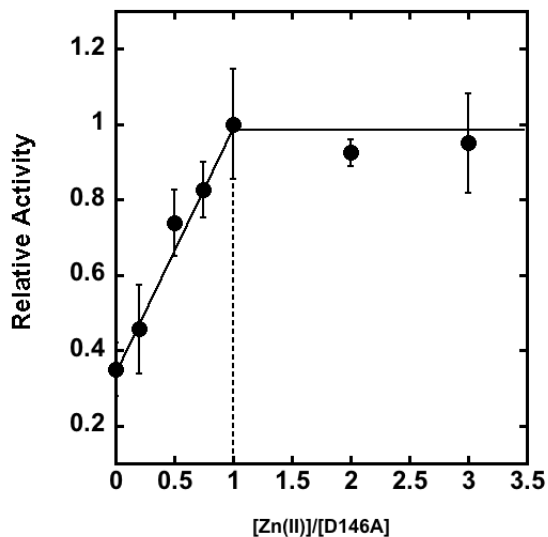

**Figure S7:** Activation of apo-D146A MshB with  $Zn^{2+}$ .  $Fe^{2+}$  Deacetylase activity was measured as a function of  $Me^{2+}$ /MshB stoichiometry. Apo-MshB was incubated with varying equivalents of  $Me^{2+}$  (0-3). After 30 minutes, the enzyme was diluted into assay buffer containing substrate GlcNAc (50 mM) and the resulting deacetylase activity was measured at 30 °C as described in “Materials and Methods”.

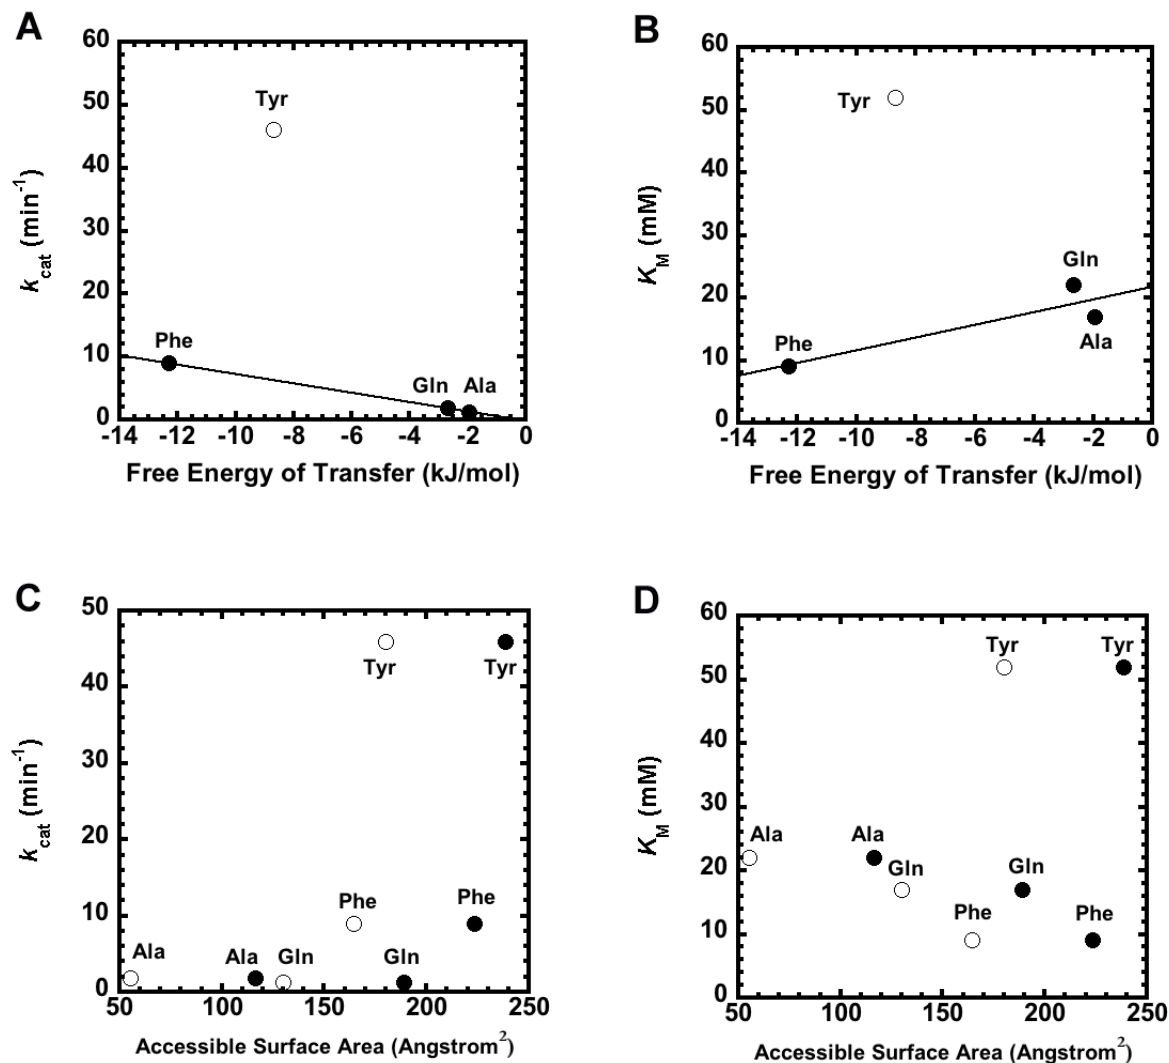

**Figure S8:** Hydrophobicity and Surface Area Correlation Plots for position 142. (A) Plot of  $k_{cat}$  vs. hydrophobicity (Free Energy of Transfer(1)) at position 142. Slope = 0.75 and  $R^2 = 0.99995$ . (B) Plot of  $K_M$  vs. hydrophobicity (Free Energy of Transfer(1)) at position 142. Slope = 1.02 and  $R^2 = 0.8081$ . (C) Plot of  $k_{cat}$  vs. Accessible Surface Area (2) for whole residue (●) or side chain (○). (D) Plot of  $K_M$  vs. Accessible Surface Area (2) for whole residue (●) or side chain (○).

1. Chan, H. S. (2002) Amino Acid Side-chain Hydrophobicity. in *Encyclopedia of Life Sciences (eLS)*, John Wiley & Sons, Ltd. pp 1-7
2. Samanta, U., Bahadur, R. P., and Chakrabarti, P. (2002) *Protein Eng.* **15**, 659-667
